# Supplementary material for: The Invasive Tradescantia zebrina Affects Litter Decomposition, but It Does Not Change the Lignocellulolytic Fungal Community in the Atlantic Forest, Brazil
Source: MDPI journal article supplement (doi:10.3390/plants12112162), 2023-05-30
Supplement: s1 [file s1]

**Table S1.** Comparison of the sequence from isolates with sequences deposited in databases ("blast").

| Isolated |     | %          | E     | Identification            | Access number | Final Identification |
|----------|-----|------------|-------|---------------------------|---------------|----------------------|
|          |     | Similarity | Value |                           |               |                      |
| 1        | 2AO | 99.76      | 0.0   | Fusarium camptoceras      | KJ782411.1    | Fusarium sp.         |
|          |     | 99.76      | 0.0   | Fusarium equiseti         | AB425996.1    |                      |
|          |     | 99.76      | 0.0   | Fusarium oxysporum        | JN400714.1    |                      |
|          |     | 99.76      | 0.0   | Fusarium sp.              | HQ023205.1    |                      |
|          |     | 99.52      | 0.0   | Fusarium equiseti         | KP026922.1    |                      |
| 2        | 2AQ | 99.19      | 0.0   | Trametes polyzona         | JN164979.1    | Trametes sp.         |
|          |     | 98.49      | 0.0   | Trametes polyzona         | MH855813.1    |                      |
|          |     | 98.48      | 0.0   | Trametes polyzona         | KT120039.1    |                      |
|          |     | 98.39      | 0.0   | Trametes polyzona         | JN164978.1    |                      |
| 3        | 2AN | 97.19      | 0.0   | Fusarium sp.              | HQ023200.1    | Fusarium sp.         |
|          |     | 96.68      | 0.0   | Fusarium sp.              | U85548.1      |                      |
|          |     | 95.62      | 0.0   | Fusarium robustum         | NR_159851.1   |                      |
|          |     | 95.62      | 0.0   | Fusarium robustum         | MH861018.1    |                      |
|          |     | 95.56      | 0.0   | Fusarium sp.              | HQ023198.1    |                      |
| 4        | 2BD | 99.39      | 0.0   | Fusarium equiseti         | KP026922.1    | Fusarium sp.         |
|          |     | 99.59      | 0.0   | Fusarium equiseti         | AB425996.1    |                      |
|          |     | 99.59      | 0.0   | Fusarium oxysporum        | JN400714.1    |                      |
|          |     | 99.38      | 0.0   | Fusarium equiseti         | GQ365157.1    |                      |
| 5        | 2M  | 98.41      | 0.0   | Aspergillus caelatus      | MH862672.1    | Aspergillus sp.      |
|          |     | 98.27      | 0.0   | Aspergillus caelatus      | KM613140.1    |                      |
|          |     | 98.12      | 0.0   | Aspergillus pseudotamarii | MH862673.1    |                      |
|          |     | 98.12      | 0.0   | Aspergillus pseudotamarii | DQ467987.1    |                      |
|          |     | 98.12      | 0.0   | Aspergillus pseudotamarii | DQ467986.1    |                      |
| 6        | 2S  | 99.79      | 0.0   | Phoma sp.                 | KP966098.1    | Phoma sp.            |
|          |     | 99.79      | 0.0   | Epicoccum sorghinum       | MN215627.1    |                      |
|          |     | 99.79      | 0.0   | Epicoccum sorghinum       | MN215624.1    |                      |
|          |     | 99.79      | 0.0   | Epicoccum sorghinum       | MN215623.1    |                      |
|          |     | 99.79      | 0.0   | Epicoccum sorghinum       | MN215622.1    |                      |
| 7        | 2AM | 100.00     | 0.0   | Alternaria doliconidium   | NR_158361.1   | Alternaria sp.       |
|          |     | 100.00     | 0.0   | Alternaria doliconidium   | MG828864.1    |                      |
|          |     | 100.00     | 0.0   | Alternaria alternata      | LN808867.1    |                      |
|          |     | 100.00     | 0.0   | Alternaria sp.            | HQ649963.1    |                      |
|          |     | 99.81      | 0.0   | Alternaria sp.            | MG209668.1    |                      |

|    |     |        |        |                         |             |                     |
|----|-----|--------|--------|-------------------------|-------------|---------------------|
| 8  | 2E  | 99.79  | 0.0    | Aspergillus sydowii     | KP973600.1  | Aspergillus sp.     |
|    |     | 99.37  | 0.0    | Aspergillus sydowii     | LN898721.1  |                     |
|    |     | 99.37  | 0.0    | Aspergillus sydowii     | LN898720.1  |                     |
|    |     | 99.37  | 0.0    | Aspergillus sydowii     | LN898719.1  |                     |
|    |     | 99.37  | 0.0    | Aspergillus sydowii     | LN898716.1  |                     |
| 9  | 2AJ | 99.57  | 0.0    | Fusarium oxysporum      | MG356946.1  | Fusarium sp.        |
|    |     | 99.57  | 0.0    | Fusarium oxysporum      | KU382653.1  |                     |
|    |     | 99.57  | 0.0    | Fusarium sp.            | GQ365161.1  |                     |
|    |     | 99.57  | 0.0    | Fusarium oxysporum      | GQ365156.1  |                     |
|    |     | 99.57  | 0.0    | Fusarium sp.            | EU363511.1  |                     |
| 10 | 1BH | 99.79  | 0.0    | Gibberella moniliformis | EU151467.1  | Fusarium sp.        |
|    |     | 99.79  | 0.0    | Gibberella fujikuroi    | AY188916.1  |                     |
|    |     | 99.79  | 0.0    | Melanospora zamiae      | KY628680.1  |                     |
|    |     | 99.58  | 0.0    | Gibberella moniliformis | EU151476.1  |                     |
|    |     | 99.58  | 0.0    | Fusarium denticulatum   | U61680.1    |                     |
| 11 | 2BH | 99.42  | 0.0    | Bipolaris gossypina     | MH864410.1  | Bipolaris sp.       |
|    |     | 99.02  | 0.0    | Bipolaris sorokiniana   | KR812216.1  |                     |
|    |     | 98.65  | 0.0    | Curvularia sp.          | KR093890.1  |                     |
|    |     | 98.23  | 0.0    | Bipolaris salviniae     | MH864690.1  |                     |
|    |     | 98.23  | 0.0    | Bipolaris salviniae     | MH864687.1  |                     |
| 12 | 2L  | 99.78  | 0.0    | Curvularia sp.          | MG976352.1  | Curvularia sp.      |
|    |     | 99.78  | 0.0    | Curvularia soli         | NR_152503.1 |                     |
|    |     | 99.78  | 0.0    | Curvularia soli         | KY905679.1  |                     |
|    |     | 99.78  | 0.0    | Curvularia sp.          | KT777714.1  |                     |
|    |     | 99.78  | 0.0    | Curvularia sp.          | KR093913.1  |                     |
| 13 | 2BB | 100.00 | 0.0    | Aspergillus sp.         | KU751784.1  | Aspergillus sp.     |
|    |     | 92.11  | 2e-151 | Aspergillus indologenus | MH861245.1  |                     |
|    |     | 92.11  | 2e-151 | Aspergillus aculeatus   | AY585557.1  |                     |
|    |     | 91.71  | 2e-151 | Aspergillus uvarum      | MH863120.1  |                     |
| 14 | 1AI | 99.77  | 0.0    | Colletotrichum acidiae  | MG996506.1  | Colleototrichum sp. |
|    |     | 99.77  | 0.0    | Colletotrichum acidiae  | NR_160841.1 |                     |
|    |     | 97.81  | 0.0    | Colletotrichum capsici  | EU056738.1  |                     |
| 15 | 2AL | 99.37  | 0.0    | Fusarium oxysporum      | MG356946.1  | Fusarium sp.        |
|    |     | 99.37  | 0.0    | Fusarium oxysporum      | KU382653.1  |                     |
|    |     | 99.37  | 0.0    | Fusarium sp.            | GQ365161.1  |                     |
|    |     | 99.37  | 0.0    | Fusarium oxysporum      | GQ365156.1  |                     |
|    |     | 99.37  | 0.0    | Fusarium sp.            | EU363511.1  |                     |

|    |     |       |     |                              |             |                    |
|----|-----|-------|-----|------------------------------|-------------|--------------------|
| 16 | 2AH | 99.79 | 0.0 | Fusarium chlamydo-<br>sporum | KM076600.1  | Fusarium sp.       |
|    |     | 99.58 | 0.0 | Fusarium equiseti            | AY213655.1  |                    |
|    |     | 99.37 | 0.0 | Fusarium sp.                 | MH582470.1  |                    |
|    |     | 99.37 | 0.0 | Fusarium sp.                 | MH582467.1  |                    |
|    |     | 99.37 | 0.0 | Fusarium sp.                 | MH582450.1  |                    |
| 17 | 1L  | 99.61 | 0.0 | Aspergillus giganteus        | MH857126.1  | Aspergillus sp.    |
|    |     | 99.59 | 0.0 | Aspergillus giganteus        | KR296897.1  |                    |
|    |     | 99.59 | 0.0 | Aspergillus giganteus        | NR_135403.1 |                    |
|    |     | 99.59 | 0.0 | Aspergillus giganteus        | EF669987.1  |                    |
|    |     | 99.59 | 0.0 | Aspergillus giganteus        | EF669928.1  |                    |
| 18 | 2F  | 99.59 | 0.0 | Aspergillus fumigatus        | MH864623.1  | Aspergillus sp.    |
|    |     | 99.59 | 0.0 | Aspergillus fumigatus        | MF476024.1  |                    |
|    |     | 99.59 | 0.0 | Aspergillus fumigatus        | KJ863511.1  |                    |
|    |     | 99.59 | 0.0 | Aspergillus fumigatus        | KP724993.1  |                    |
|    |     | 99.59 | 0.0 | Aspergillus fumigatus        | KP724992.1  |                    |
| 19 | 2AC | 99.00 | 0.0 | Fusarium subglutinans        | EU117221.1  | Fusarium sp.       |
|    |     | 99.00 | 0.0 | Fusarium proliferatum        | EF589878.1  |                    |
|    |     | 99.00 | 0.0 | Fusarium sp.                 | KM104592.1  |                    |
| 20 | 2AU | 99.58 | 0.0 | Colletotrichum fusiforme     | NR_160841.1 | Colletotrichum sp. |
|    |     | 99.38 | 0.0 | Colletotrichum acidiae       | MG996506.1  |                    |
|    |     | 97.62 | 0.0 | Colletotrichum capsici       | EU056738.1  |                    |
|    |     | 97.43 | 0.0 | Colletotrichum capsici       | LC152972.1  |                    |
|    |     | 97.43 | 0.0 | Glomerella truncata          | FJ172230.1  |                    |
| 21 | 2AR | 98.96 | 0.0 | Colletotrichum acidiae       | NR_160841.1 | Colletotrichum sp. |
|    |     | 98.76 | 0.0 | Colletotrichum acidiae       | MG996506.1  |                    |
|    |     | 97.24 | 0.0 | Colletotrichum capsici       | EU056738.1  |                    |
|    |     | 97.05 | 0.0 | Colletotrichum capsici       | LC152972.1  |                    |
| 22 | 1AN | 98.39 | 0.0 | Fusarium incarnatum          | MF356578.1  | Fusarium sp.       |
|    |     | 98.20 | 0.0 | Fusarium chlamydo-<br>sporum | KM076600.1  |                    |
|    |     | 98.20 | 0.0 | Fusarium sp.                 | GQ352485.1  |                    |
|    |     | 98.20 | 0.0 | Fusarium incarnatum          | MH865893.1  |                    |
| 23 | 1BL | 99.56 | 0.0 | Fusarium proliferatum        | MG228402.1  | Fusarium sp.       |
|    |     | 99.56 | 0.0 | Fusarium proliferatum        | MG228401.1  |                    |
|    |     | 99.56 | 0.0 | Fusarium sp.                 | MK432970.1  |                    |
|    |     | 99.13 | 0.0 | fusarium oxysporum           | JN400715.1  |                    |
|    |     | 99.13 | 0.0 | fusarium oxysporum           | JN400698.1  |                    |

|    |     |       |     |                              |             |                 |
|----|-----|-------|-----|------------------------------|-------------|-----------------|
| 24 | 1K  | 99.16 | 0.0 | Penicillium citrinum         | KM613148.1  | Penicillium sp. |
|    |     | 98.57 | 0.0 | Penicillium citrinum         | KX066022.1  |                 |
|    |     | 98.57 | 0.0 | Penicillium citrinum         | KX066021.1  |                 |
|    |     | 98.37 | 0.0 | Penicillium sp.              | GU017521.1  |                 |
|    |     | 98.37 | 0.0 | Penicillium griseofulvum     | FJ717687.1  |                 |
| 25 | 2AS | 99.58 | 0.0 | Volutella lini               | JQ693169.1  | Volutella sp.   |
|    |     | 99.41 | 0.0 | Volutella lini               | JQ647452.1  |                 |
|    |     | 93.35 | 0.0 | volutella consors            | KM231768.1  |                 |
| 26 | 2AV | 98.96 | 0.0 | Fusarium sp.                 | HQ023200.1  | Fusarium sp.    |
|    |     | 98.16 | 0.0 | Fusarium robustum            | NR_159851.1 |                 |
|    |     | 98.16 | 0.0 | Fusarium robustum            | MH861018.1  |                 |
|    |     | 97.96 | 0.0 | Fusarium robustum            | U85539.1    |                 |
|    |     | 97.69 | 0.0 | Gibberella pulicaris         | DQ026011.1  |                 |
| 27 | 2AZ | 93.33 | 0.0 | Gibberella moniliformis      | EU151482.1  | NI              |
|    |     | 93.26 | 0.0 | Fusarium sp.                 | KU382552.1  |                 |
| 28 | 2BA | 98.13 | 0.0 | Fusarium equiseti            | HQ649909.1  | Fusarium sp.    |
|    |     | 98.13 | 0.0 | Fusarium equiseti            | HQ649904.1  |                 |
|    |     | 98.13 | 0.0 | Fusarium equiseti            | HQ649906.1  |                 |
|    |     | 98.13 | 0.0 | Fusarium equiseti            | HQ649905.1  |                 |
|    |     | 97.93 | 0.0 | Fusarium caatingaense        | MH668833.1  |                 |
| 29 | 2BF | 98.38 | 0.0 | Fusarium sp.                 | GQ352485.1  | Fusarium sp.    |
|    |     | 98.38 | 0.0 | Fusarium chlamydo-<br>sporum | MF072670.1  |                 |
|    |     | 98.38 | 0.0 | Fusarium incarnatum          | MF356578.1  |                 |
| 30 | 2N  | 98.25 | 0.0 | Curvularia sp.               | HQ909079.1  | Curvularia sp.  |
|    |     | 98.24 | 0.0 | Curvularia clavata           | MN592977.1  |                 |
|    |     | 98.24 | 0.0 | Curvularia sp.               | MG976352.1  |                 |
|    |     | 98.24 | 0.0 | Curvularia soli              | NR_152503.1 |                 |
|    |     | 98.24 | 0.0 | Curvularia soli              | KY905679.1  |                 |
| 31 | 2Y  | 94.91 | 0.0 | Byssochlamys spectabilis     | MH856887.1  | NI              |
|    |     | 94.91 | 0.0 | Paecilomyces variotii        | JF766675.1  |                 |
|    |     | 94.91 | 0.0 | Paecilomyces variotii        | GU968674.1  |                 |
|    |     | 94.91 | 0.0 | Paecilomyces variotii        | FJ389930.1  |                 |
|    |     | 94.91 | 0.0 | Paecilomyces variotii        | AF033395.1  |                 |
| 32 | 2O  | 98.90 | 0.0 | Dothideales sp.              | HQ608008.1  | Epicoccum sp.   |
|    |     | 98.90 | 0.0 | Epicoccum sp.                | MG976442.1  |                 |
|    |     | 98.90 | 0.0 | Epicoccum sp.                | MG976431.1  |                 |
|    |     | 98.90 | 0.0 | Epicoccum sp.                | LT592959.1  |                 |

|    |     |       |     |                                   |            |                  |
|----|-----|-------|-----|-----------------------------------|------------|------------------|
|    |     | 98.90 | 0.0 | Epicoccum sp.                     | LT592927.1 |                  |
| 33 | 2R  | 95.63 | 0.0 | Montagnula cirsii                 | KX274242.1 | Montagnula sp.   |
|    |     | 95.49 | 0.0 | Montagnula scabiosae              | NR_155378  |                  |
|    |     | 95.49 | 0.0 | Montagnula scabiosae              | KT443907   |                  |
| 34 | 2B  | 99.29 | 0.0 | Trichoderma hamatum               | MH864073.1 | Trichoderma sp.  |
|    |     | 99.12 | 0.0 | Trichoderma harzianum             | KR868288.1 |                  |
|    |     | 99.12 | 0.0 | Hypocrea lixii                    | HQ011501.1 |                  |
|    |     | 99.12 | 0.0 | Trichoderma harzianum             | KR868336.1 |                  |
|    |     | 99.12 | 0.0 | Trichoderma harzianum             | KR868321.1 |                  |
| 35 | 2J  | 99.08 | 0.0 | Fusarium oxysporum                | DQ068983.1 | Fusarium sp.     |
|    |     | 98.87 | 0.0 | Fusarium oxysporum                | KX786247.1 |                  |
|    |     | 98.87 | 0.0 | Fusarium oxysporum                | KX786244.1 |                  |
|    |     | 98.87 | 0.0 | Fusarium oxysporum                | KX786241.1 |                  |
|    |     | 98.87 | 0.0 | Fusarium oxysporum                | LN828174.1 |                  |
| 36 | 1AS | 99.31 | 0.0 | Fusarium solani                   | MH348949.1 | Fusarium sp.     |
|    |     | 99.31 | 0.0 | Fusarium solani                   | MH348946.1 |                  |
|    |     | 99.31 | 0.0 | Fusarium solani                   | MH348944.1 |                  |
|    |     | 99.30 | 0.0 | Fusarium solani                   | LN828130.1 |                  |
|    |     | 98.85 | 0.0 | Fusarium solani                   | MH865999.1 |                  |
| 37 | 2AW | 98.88 | 0.0 | Clonostachys sp.                  | KY413708.1 | Clonostachys sp. |
|    |     | 98.88 | 0.0 | Clonostachys sp.                  | KY413698.1 |                  |
|    |     | 98.62 | 0.0 | Gliocladium sp.                   | AF139857.1 |                  |
|    |     | 98.42 | 0.0 | Clonostachys sp.                  | MH267864.1 |                  |
|    |     | 98.42 | 0.0 | Clonostachys rogersoni-<br>ana    | KR812215.1 |                  |
| 38 | 2A  | 98.99 | 0.0 | Cladosporium cladospori-<br>oides | MF044039.1 | Cladosporium sp. |
|    |     | 98.99 | 0.0 | Cladosporium tenuissi-<br>mum     | MF473296.1 |                  |
|    |     | 98.99 | 0.0 | Cladosporium tenuissi-<br>mum     | MF473282.1 |                  |
|    |     | 98.99 | 0.0 | Cladosporium tenuissi-<br>mum     | MF473290.1 |                  |
|    |     | 98.99 | 0.0 | Cladosporium tenuissi-<br>mum     | LN834398.1 |                  |
| 39 | 1G  | 99.77 | 0.0 | Aspergillus sydowii               | MH858253.1 | Aspergillus sp.  |
|    |     | 99.77 | 0.0 | Aspergillus sydowii               | MH854859.1 |                  |
|    |     | 99.77 | 0.0 | Aspergillus sp.                   | MG976613.1 |                  |
|    |     | 99.77 | 0.0 | Aspergillus sydowii               | LN898735.1 |                  |
|    |     | 99.77 | 0.0 | Aspergillus sydowii               | LN898734.1 |                  |

|    |     |       |     |                              |             |                  |
|----|-----|-------|-----|------------------------------|-------------|------------------|
| 40 | 1M  | 99.60 | 0.0 | Aspergillus sydowii          | MH854859.1  | Aspergillus sp.  |
|    |     | 99.60 | 0.0 | Aspergillus sp.              | MG976613.1  |                  |
|    |     | 99.60 | 0.0 | Aspergillus sydowii          | LN898735.1  |                  |
|    |     | 99.60 | 0.0 | Aspergillus sydowii          | LN898734.1  |                  |
|    |     | 99.60 | 0.0 | Aspergillus sydowii          | KT826624.1  |                  |
| 41 | 1J  | 96.30 | 0.0 | Cladosporium cladosporioides | MF072635.1  | Cladosporium sp. |
|    |     | 96.30 | 0.0 | Cladosporium cladosporioides | MF072642.1  |                  |
|    |     | 96.30 | 0.0 | Cladosporium sp.             | LN809014.1  |                  |
|    |     | 96.30 | 0.0 | Cladosporium cladosporioides | LN809009.1  |                  |
|    |     | 96.30 | 0.0 | Cladosporium cladosporioides | LN809000.1  |                  |
| 42 | 1AE | 99.22 | 0.0 | Aspergillus versicolor       | AM883155.1  | Aspergillus sp.  |
|    |     | 99.04 | 0.0 | Aspergillus tabacinus        | LN898739.1  |                  |
|    |     | 99.04 | 0.0 | Aspergillus tabacinus        | LN898738.1  |                  |
|    |     | 99.04 | 0.0 | Aspergillus tabacinus        | LN898737.1  |                  |
|    |     | 99.04 | 0.0 | Aspergillus tabacinus        | LN898736.1  |                  |
| 43 | 1AM | 98.23 | 0.0 | Fusarium chlamydosporum      | AY213655.1  | Fusarium sp.     |
|    |     | 98.01 | 0.0 | Fusarium chlamydosporum      | KM076600.1  |                  |
|    |     | 97.79 | 0.0 | Fusarium incarnatum          | MH865897.1  |                  |
|    |     | 97.79 | 0.0 | Fusarium incarnatum          | MH865895.1  |                  |
|    |     | 97.79 | 0.0 | Fusarium camptoceras         | MH858537.1  |                  |
| 44 | 2AA | 97.94 | 0.0 | Trichoderma spirale          | FJ861463.1  | Trichoderma sp.  |
|    |     | 97.38 | 0.0 | Trichoderma harzianum        | FJ884153.1  |                  |
|    |     | 97.37 | 0.0 | Trichoderma spirale          | KR296909.1  |                  |
|    |     | 97.22 | 0.0 | Trichoderma spirale          | KT278911.1  |                  |
|    |     | 97.05 | 0.0 | Trichoderma spirale          | KP263614.1  |                  |
| 45 | 1AG | 95.82 | 0.0 | Bionectria sp.               | HM849058.1  | NI               |
|    |     | 95.80 | 0.0 | Clonostachys rosea           | KJ619987.1  |                  |
|    |     | 95.80 | 0.0 | Bionectria ochroleuca        | AY669327.1  |                  |
|    |     | 95.76 | 0.0 | Bionectria sp.               | AB734437.1  |                  |
| 46 | 2X  | 97.79 | 0.0 | Roussoella solani            | LC195220.1  | Roussoella sp.   |
|    |     | 97.79 | 0.0 | Roussoella solani            | LC195219.1  |                  |
|    |     | 97.79 | 0.0 | Roussoella solani            | LC195218.1  |                  |
|    |     | 97.78 | 0.0 | Neoroussoella leucaenae      | NR_165226.1 |                  |
|    |     | 97.78 | 0.0 | Neoroussoella entadae        | MK347786.1  |                  |

|    |     |        |     |                          |             |                    |
|----|-----|--------|-----|--------------------------|-------------|--------------------|
| 47 | 1E  | 99.81  | 0.0 | Curvularia sp.           | MG976352.1  | Curvularia sp.     |
|    |     | 99.81  | 0.0 | Curvularia soli          | NR_152503.1 |                    |
|    |     | 99.81  | 0.0 | Curvularia soli          | KY905679.1  |                    |
|    |     | 99.81  | 0.0 | Curvularia sp.           | KR093913.1  |                    |
|    |     | 99.81  | 0.0 | Curvularia senegalensis  | HG779001.1  |                    |
| 48 | 1AU | 100.00 | 0.0 | Fusarium camptoceras     | KJ782411.1  | Fusarium sp.       |
|    |     | 99.59  | 0.0 | Fusarium equiseti        | AB425996.1  |                    |
|    |     | 99.59  | 0.0 | Fusarium oxysporum       | JN400714.1  |                    |
|    |     | 99.59  | 0.0 | Fusarium sp.             | HQ023205.1  |                    |
|    |     | 99.39  | 0.0 | Fusarium sp.             | EF120420.1  |                    |
| 49 | 2I  | 99.82  | 0.0 | Mucor sp.                | JF723592.1  | Mucor sp.          |
|    |     | 99.65  | 0.0 | Mucoraceae sp.           | KX148752.1  |                    |
|    |     | 99.33  | 0.0 | Mucor fragilis           | FN650655.1  |                    |
|    |     | 98.64  | 0.0 | Mucor fragilis           | KY047150.1  |                    |
|    |     | 98.64  | 0.0 | Mucor fragilis           | KY047147.1  |                    |
| 50 | 2G  | 100.00 | 0.0 | Penicillium sp.          | GU017521.1  | Penicillium sp.    |
|    |     | 100.00 | 0.0 | Penicillium sp.          | GU017519.1  |                    |
|    |     | 100.00 | 0.0 | Penicillium griseofulvum | FJ717687.1  |                    |
|    |     | 100.00 | 0.0 | Penicillium citrinum     | MH864240.1  |                    |
|    |     | 100.00 | 0.0 | Penicillium citrinum     | MH858380.1  |                    |
| 51 | 1AH | 99.46  | 0.0 | Pleosporales sp.         | KP306958.1  | NI                 |
|    |     | 99.29  | 0.0 | Roussoella solani        | LC195220.1  |                    |
|    |     | 99.28  | 0.0 | Pleosporales sp.         | KP263105.1  |                    |
|    |     | 99.28  | 0.0 | Ascomycota sp.           | JX966643.1  |                    |
|    |     | 99.25  | 0.0 | Roussoella solani        | MH923251.1  |                    |
| 52 | 1AY | 97.89  | 0.0 | Myrothecium roridum      | KJ815095.1  | Myrothecium sp.    |
|    |     | 97.73  | 0.0 | Myrothecium roridum      | KJ174523.1  |                    |
|    |     | 97.57  | 0.0 | Paramyrothecium roridum  | MH856665.1  |                    |
|    |     | 97.57  | 0.0 | Paramyrothecium roridum  | KU846301.1  |                    |
|    |     | 97.57  | 0.0 | Myrothecium roridum      | JF343832.1  |                    |
| 53 | 1BG | 95.16  | 0.0 | Myrothecium inundatum    | KU856653.1  | Myrothecium sp.    |
|    |     | 94.58  | 0.0 | Myrothecium inundatum    | LC387258.1  |                    |
|    |     | 94.58  | 0.0 | Myrothecium inundatum    | JN851023.1  |                    |
| 54 | 1R  | 97.93  | 0.0 | Colletotrichum dematium  | AB046608.1  | Colletotrichum sp. |
|    |     | 97.93  | 0.0 | Colletotrichum capsici   | EU056740.1  |                    |
|    |     | 97.76  | 0.0 | Colletotrichum dematium  | AB042310.1  |                    |

|           |            |       |     |                              |             |                    |
|-----------|------------|-------|-----|------------------------------|-------------|--------------------|
|           |            | 97.60 | 0.0 | Colletotrichum truncatum     | KC460308.1  |                    |
|           |            | 97.60 | 0.0 | Colletotrichum truncatum     | AJ301945.1  |                    |
| <b>55</b> | <b>1U</b>  | 99.30 | 0.0 | Aspergillus tabacinus        | LN898739.1  | Aspergillus sp.    |
|           |            | 99.30 | 0.0 | Aspergillus sp.              | FJ770064.1  |                    |
|           |            | 99.29 | 0.0 | Aspergillus versicolor       | AM883155.1  |                    |
|           |            | 99.29 | 0.0 | Aspergillus tabacinus        | LN898736.1  |                    |
|           |            | 99.28 | 0.0 | Aspergillus tabacinus        | FR733851.1  |                    |
| <b>56</b> | <b>1W</b>  | 97.59 | 0.0 | Colletotrichum dematium      | AB046608.1  | Colletotrichum sp. |
|           |            | 97.59 | 0.0 | Colletotrichum capsici       | EU056740.1  |                    |
|           |            | 97.42 | 0.0 | Colletotrichum dematium      | Ab042310.1  |                    |
|           |            | 97.26 | 0.0 | Colletotrichum truncatum     | MG677594.1  |                    |
| <b>57</b> | <b>1Z</b>  | 99.35 | 0.0 | Nigrograna mackinnonii       | NR_132037.1 | NI                 |
|           |            | 99.18 | 0.0 | Biatriospora mackinnonii     | LN626660.1  |                    |
|           |            | 98.79 | 0.0 | Nigrograna mackinnonii       | LN626659.1  |                    |
|           |            | 98.70 | 0.0 | Pleosporales sp.             | KP263091.1  |                    |
|           |            | 98.70 | 0.0 | Nigrograna mackinnonii       | KC288117.1  |                    |
| <b>58</b> | <b>2Q</b>  | 99.28 | 0.0 | Ascomycota sp.               | KP306958.1  | Roussoella sp.     |
|           |            | 99.11 | 0.0 | Roussoella solani            | LC195220.1  |                    |
|           |            | 99.11 | 0.0 | Roussoella solani            | LC195219.1  |                    |
|           |            | 99.11 | 0.0 | Roussoella solani            | LC195218.1  |                    |
|           |            | 99.11 | 0.0 | Pleosporales sp.             | KP263105.1  |                    |
| <b>59</b> | <b>2V</b>  | 98.79 | 0.0 | Fusarium chlamydo-<br>sporum | MF072670.1  | Fusarium sp.       |
|           |            | 98.42 | 0.0 | Fusarium chlamydo-<br>sporum | AY213655.1  |                    |
|           |            | 98.42 | 0.0 | Fusarium equiseti            | HQ649909.1  |                    |
|           |            | 98.41 | 0.0 | Fusarium equiseti            | HQ649905.1  |                    |
|           |            | 98.23 | 0.0 | Fusarium incarnatum          | MH857950.1  |                    |
| <b>60</b> | <b>2T</b>  | 97.18 | 0.0 | Colletotrichum siamense      | KP703406.1  | Colletotrichum sp. |
|           |            | 97.18 | 0.0 | Colletotrichum siamense      | KP703404.1  |                    |
|           |            | 97.18 | 0.0 | Colletotrichum siamense      | KP703403.1  |                    |
|           |            | 97.18 | 0.0 | Colletotrichum siamense      | KP703402.1  |                    |
|           |            | 97.18 | 0.0 | Colletotrichum siamense      | KP703385.1  |                    |
| <b>61</b> | <b>2AI</b> | 98.64 | 0.0 | Eutypella sp.                | KY083415.1  | Eutypella sp.      |
|           |            | 98.63 | 0.0 | Eutypella scoparia           | JQ922162.1  |                    |
|           |            | 98.60 | 0.0 | Eutypella sp.                | JQ411308.1  |                    |
|           |            | 98.44 | 0.0 | Peroneutypa scoparia         | MG873478.1  |                    |
|           |            | 98.44 | 0.0 | Eutypella sp.                | GQ293963.1  |                    |



|    |     |       |      |                            |             |                    |
|----|-----|-------|------|----------------------------|-------------|--------------------|
| 62 | 2AF | 98.65 | 0.0  | Trichoderma asperellum     | KC993073.1  | Trichoderma sp.    |
|    |     | 98.64 | 0.0  | Trichoderma lieckfeldtia   | DQ109529.1  |                    |
|    |     | 98.64 | 0.0  | Trichoderma asperellum     | KX510127.1  |                    |
|    |     | 98.65 | 0.0  | Trichoderma asperellum     | MH153605.1  |                    |
|    |     | 98.65 | 0.0  | Trichoderma sp.            | MK044000.1  |                    |
| 63 | 1O  | 99.19 | 0.0  | Aspergillus tabacinus      | AM883155.1  | Aspergillus sp.    |
|    |     | 99.00 | 0.0  | Aspergillus tabacinus      | LN898739.1  |                    |
|    |     | 99.00 | 0.0  | Aspergillus tabacinus      | LN898738.1  |                    |
|    |     | 99.00 | 0.0  | Aspergillus tabacinus      | LN898737.1  |                    |
|    |     | 99.00 | 0.0  | Aspergillus tabacinus      | FR733851.1  |                    |
| 64 | 1F  | 98.01 | 0.0  | Hypocrea sp.               | HQ657316.1  | Trichoderma sp.    |
|    |     | 98.01 | 0.0  | Trichoderma hamatum        | MH864073.1  |                    |
|    |     | 98.01 | 0.0  | Trichoderma inhamatum      | MH857107.1  |                    |
|    |     | 98.01 | 0.0  | Trichoderma harzianum      | KT278882.1  |                    |
|    |     | 98.01 | 0.0  | Trichoderma harzianum      | KR868358.1  |                    |
| 65 | 2D  | 99.38 | 00.0 | Penicillium sp.            | KX148648.1  | Penicillium sp.    |
|    |     | 99.17 | 0.0  | Penicillium sp.            | GU017521.1  |                    |
|    |     | 99.17 | 0.0  | Penicillium sp.            | GU017519.1  |                    |
|    |     | 99.17 | 0.0  | Penicillium griseofulvum   | FJ717687.1  |                    |
|    |     | 99.17 | 0.0  | Penicillium citrinum       | MH864240    |                    |
| 66 | 2AG | 99.16 | 0.0  | Lasiodiplodia goni-biensis | KM006443.1  | Lasiodiplodia sp.  |
|    |     | 99.16 | 0.0  | Lasiodiplodia goni-biensis | KF766191.1  |                    |
|    |     | 99.16 | 0.0  | Lasiodiplodia goni-biensis | NR_111218.1 |                    |
|    |     | 99.13 | 0.0  | Lasiodiplodia goni-biensis | AY639594.1  |                    |
|    |     | 98.95 | 0.0  | Lasiodiplodia goni-biensis | MH057180.1  |                    |
| 67 | 1BJ | 99.08 | 0.0  | Trichoderma spirale        | KT278877.1  | Trichoderma sp.    |
|    |     | 99.08 | 0.0  | Trichoderma sp.            | LC229678.1  |                    |
|    |     | 98.90 | 0.0  | Trichoderma spirale        | KT278886.1  |                    |
|    |     | 98.90 | 0.0  | Trichoderma spirale        | KR093830.1  |                    |
|    |     | 98.90 | 0.0  | Trichoderma spirale        | EU280082.1  |                    |
| 68 | 2K  | 98.85 | 0.0  | Pestalotiopsis microspora  | KT459350.1  | Pestalotiopsis sp. |
|    |     | 98.85 | 0.0  | Pestalotiopsis microspora  | DQ456865.1  |                    |
|    |     | 98.85 | 0.0  | Pestalotiopsis microspora  | AY924279.1  |                    |
|    |     | 98.85 | 0.0  | Pestalotiopsis sp.         | HQ909077.1  |                    |
|    |     | 98.62 | 0.0  | Pestalotiopsis microspora  | AY924271.1  |                    |

|    |     |        |     |                            |             |                 |
|----|-----|--------|-----|----------------------------|-------------|-----------------|
| 69 | 1P  | 100.00 | 0.0 | Phoma sp.                  | JQ649376.1  | Phoma sp.       |
|    |     | 100.00 | 0.0 | Phoma sp.                  | KP306990.1  |                 |
|    |     | 100.00 | 0.0 | Phoma sp.                  | KP306982.1  |                 |
|    |     | 100.00 | 0.0 | Phoma sp.                  | MN435151.1  |                 |
|    |     | 100.00 | 0.0 | Phoma sp.                  | KP306984.1  |                 |
| 70 | 1BD | 96.79  | 0.0 | Xenomyrothecium tongaense  | MH861297.1  | Myrothecium sp. |
|    |     | 96.43  | 0.0 | Myrothecium inundatum      | KU856653.1  |                 |
|    |     | 96.22  | 0.0 | Myrothecium inundatum      | LC387258.1  |                 |
|    |     | 96.22  | 0.0 | Myrothecium inundatum      | LC387257.1  |                 |
|    |     | 96.22  | 0.0 | Myrothecium inundatum      | LC387254.1  |                 |
| 71 | 1S  | 97.39  | 0.0 | Ramophialophora globispora | KU746700.1  | NI              |
|    |     | 96.91  | 0.0 | Ramophialophora globispora | KU746699.1  |                 |
|    |     | 95.23  | 0.0 | Sordariomycetes sp.        | KR909162.1  |                 |
| 72 | 1BM | 99.60  | 0.0 | Penicillium sp.            | GU017521.1  | Penicillium sp. |
|    |     | 99.60  | 0.0 | Penicillium griseofulvum   | FJ717687.1  |                 |
|    |     | 99.60  | 0.0 | Penicillium citrinum       | MH864240.1  |                 |
|    |     | 99.60  | 0.0 | Penicillium citrinum       | MH858380.1  |                 |
|    |     | 99.60  | 0.0 | Penicillium citrinum       | MH856132.1  |                 |
| 73 | 1BE | 98.05  | 0.0 | Diaporthe sp.              | MG976437.1  | Diaporthe sp.   |
|    |     | 97.39  | 0.0 | Diaporthe sp.              | MG976357.1  |                 |
|    |     | 97.05  | 0.0 | Diaporthe conorum          | DQ116552.1  |                 |
|    |     | 96.59  | 0.0 | Diaporthe citri            | KC343053.1  |                 |
|    |     | 96.59  | 0.0 | Diaporthe sp.              | MG976377.1  |                 |
| 74 | 1BK | 99.58  | 0.0 | Fusarium incarnatum        | KU382560.1  | Fusarium sp.    |
|    |     | 99.58  | 0.0 | Fusarium sp.               | HQ023205.1  |                 |
|    |     | 98.97  | 0.0 | Fusarium oxysporum         | JN400714.1  |                 |
| 75 | 1N  | 98.99  | 0.0 | Sarocladium glaucum        | AB540577.1  | Sarocladium sp. |
|    |     | 98.57  | 0.0 | Sarocladium glaucum        | NR_130686.1 |                 |
|    |     | 98.39  | 0.0 | Sarocladium glaucum        | MH860868.1  |                 |
|    |     | 98.38  | 0.0 | Sarocladium glaucum        | HG965020.1  |                 |
|    |     | 98.09  | 0.0 | Sarocladium glaucum        | HG965019.1  |                 |
| 76 | 2AD | 97.09  | 0.0 | Fusarium sp.               | HQ023200.1  | Fusarium sp.    |
|    |     | 96.42  | 0.0 | Fusarium robustum          | NR_159851.1 |                 |
|    |     | 96.42  | 0.0 | Fusarium robustum          | MH861018.1  |                 |
|    |     | 96.20  | 0.0 | Fusarium robustum          | U85539.1    |                 |
|    |     | 95.75  | 0.0 | Fusarium sp.               | U85548.1    |                 |

|    |     |       |        |                                  |             |                    |
|----|-----|-------|--------|----------------------------------|-------------|--------------------|
| 77 | 2BC | 99.79 | 0.0    | Bionectria sp.                   | KF746125.1  | NI                 |
|    |     | 99.57 | 0.0    | Clonostachys pityrodes           | JQ411387.1  |                    |
|    |     | 99.17 | 0.0    | Bionectria pityrodes             | AF210673.1  |                    |
|    |     | 98.75 | 0.0    | Bionectria pityrodes             | AF210672.1  |                    |
|    |     | 98.63 | 0.0    | Clonostachys pityrodes           | MH864280.1  |                    |
| 78 | 1BA | 99.15 | 0.0    | Nigrospora pryzae                | KJ159597.1  | Nigrospora sp.     |
|    |     | 99.14 | 0.0    | Nigrospora sacchari-of-ficinarum | NR_165926.1 |                    |
|    |     | 99.14 | 0.0    | Nigrospora sp.                   | MN215791.1  |                    |
|    |     | 98.85 | 0.0    | Nigrospora sp.                   | HQ630982.1  |                    |
|    |     | 98.74 | 0.0    | Nigrospora sp.                   | JN207335.1  |                    |
| 79 | 1AD | 99.63 | 0.0    | Penicillium meleagrinum          | HE962595.1  | Penicillium sp.    |
|    |     | 99.28 | 0.0    | Penicillium meleagrinum          | HM469412.1  |                    |
|    |     | 99.28 | 0.0    | Penicillium meleagrinum          | EF198529.1  |                    |
|    |     | 99.28 | 0.0    | Penicillium meleagrinum          | EF198530.1  |                    |
|    |     | 99.28 | 0.0    | Penicillium sp.                  | JF439496.1  |                    |
| 80 | 1D  | 92.90 | 9e-180 | Mucor nidicola                   | JF299215.1  | Mucor sp.          |
|    |     | 92.86 | 0.0    | Mucor sp.                        | FJ210509.1  |                    |
|    |     | 90.02 | 0.0    | Mucor sp.                        | FJ210517.1  |                    |
|    |     | 89.95 | 0.0    | Mucor nidicola                   | HQ913647.1  |                    |
| 81 | 2BE | 98.41 | 0.0    | Wiesneriomyces laurinus          | KR822214.1  | Wiesneriomyces sp. |
|    |     | 87.27 | 2e-111 | Helicosporium gracile            | AY916485.1  |                    |
|    |     | 86.87 | 1e-113 | Neofusiciccum mediterraneum      | EU040221.1  |                    |

NI: Unable to get identification
